# Supplementary material for: Risk factors for contrast-induced acute kidney injury (CI-AKI): protocol for systematic review and meta-analysis
Source: PubMed Central journal article supplement — BMJ Open. 2019 Aug 15;9(8):e030048. doi: 10.1136/bmjopen-2019-030048 (PMC6701697; doi:10.1136/bmjopen-2019-030048), 2019-08-15
Supplement: bmjopen-2019-030048.draft_revisions.pdf [file bmjopen-2019-030048.draft_revisions.pdf]

# BMJ Open

BMJ Open is committed to open peer review. As part of this commitment we make the peer review history of every article we publish publicly available.

When an article is published we post the peer reviewers' comments and the authors' responses online. We also post the versions of the paper that were used during peer review. These are the versions that the peer review comments apply to.

The versions of the paper that follow are the versions that were submitted during the peer review process. They are not the versions of record or the final published versions. They should not be cited or distributed as the published version of this manuscript.

BMJ Open is an open access journal and the full, final, typeset and author-corrected version of record of the manuscript is available on our site with no access controls, subscription charges or pay-per-view fees (<http://bmjopen.bmj.com>).

If you have any questions on BMJ Open's open peer review process please email [info.bmjopen@bmj.com](mailto:info.bmjopen@bmj.com)

# BMJ Open

## Risk Factors for Contrast-Induced Nephropathy: Protocol for Systematic Review and Meta-analysis

|                               |                                                                                                                                                                                                                                                                                                                                                                                                                                                                                                                                                                                                                                                                                                                                                                                                                                                                                                                                                                                                                                                                                                                                                                                                                                                                                                                                                                                                                                                                                                                                                                                                                                                                                                                                                                                                                                                                                                                                                                                                                                                                                                   |
|-------------------------------|---------------------------------------------------------------------------------------------------------------------------------------------------------------------------------------------------------------------------------------------------------------------------------------------------------------------------------------------------------------------------------------------------------------------------------------------------------------------------------------------------------------------------------------------------------------------------------------------------------------------------------------------------------------------------------------------------------------------------------------------------------------------------------------------------------------------------------------------------------------------------------------------------------------------------------------------------------------------------------------------------------------------------------------------------------------------------------------------------------------------------------------------------------------------------------------------------------------------------------------------------------------------------------------------------------------------------------------------------------------------------------------------------------------------------------------------------------------------------------------------------------------------------------------------------------------------------------------------------------------------------------------------------------------------------------------------------------------------------------------------------------------------------------------------------------------------------------------------------------------------------------------------------------------------------------------------------------------------------------------------------------------------------------------------------------------------------------------------------|
| Journal:                      | <i>BMJ Open</i>                                                                                                                                                                                                                                                                                                                                                                                                                                                                                                                                                                                                                                                                                                                                                                                                                                                                                                                                                                                                                                                                                                                                                                                                                                                                                                                                                                                                                                                                                                                                                                                                                                                                                                                                                                                                                                                                                                                                                                                                                                                                                   |
| Manuscript ID                 | bmjopen-2019-030048                                                                                                                                                                                                                                                                                                                                                                                                                                                                                                                                                                                                                                                                                                                                                                                                                                                                                                                                                                                                                                                                                                                                                                                                                                                                                                                                                                                                                                                                                                                                                                                                                                                                                                                                                                                                                                                                                                                                                                                                                                                                               |
| Article Type:                 | Protocol                                                                                                                                                                                                                                                                                                                                                                                                                                                                                                                                                                                                                                                                                                                                                                                                                                                                                                                                                                                                                                                                                                                                                                                                                                                                                                                                                                                                                                                                                                                                                                                                                                                                                                                                                                                                                                                                                                                                                                                                                                                                                          |
| Date Submitted by the Author: | 27-Feb-2019                                                                                                                                                                                                                                                                                                                                                                                                                                                                                                                                                                                                                                                                                                                                                                                                                                                                                                                                                                                                                                                                                                                                                                                                                                                                                                                                                                                                                                                                                                                                                                                                                                                                                                                                                                                                                                                                                                                                                                                                                                                                                       |
| Complete List of Authors:     | <p>Liu, Yong; Guangdong Cardiovascular Institute<br/> Liang, Xingcheng; Guangdong Cardiovascular Institute; School of Pharmacy, Guangdong Pharmaceutical University, Guangzhou, 510000, Guangdong, China<br/> Xin, Shaojun; Guangdong General Hospital; School of Pharmacy, Guangdong Pharmaceutical University, Guangzhou, 510000, Guangdong, China<br/> Liu, Jin; Guangdong General Hospital,<br/> Sun, Guo-li; Guangdong Cardiovascular Institute, cardiology<br/> Chen, Shi-qun; Guangdong Cardiovascular Institute, Guangdong provincial Key Laboratory of Coronary Heart Disease Prevention, Guangdong General Hospital, Guangdong Academy of Medical Sciences, Cardiology<br/> cen, xiaolin; Guangdong Cardiovascular Institute; School of Pharmacy, Guangdong Pharmaceutical University, Guangzhou, 510000, Guangdong, China<br/> dai, xiaohua; Guangdong Cardiovascular Institute; School of Pharmacy, Guangdong Pharmaceutical University, Guangzhou, 510000, Guangdong, China<br/> He, Yibo; Guangdong Cardiovascular Institute,<br/> Song, Feier; Department of Cardiology, Provincial Key Laboratory of Coronary Heart Disease, Guangdong Cardiovascular Institute, Guangdong General Hospital, Guangdong Academy of Medical Sciences, Guangzhou 510100, China, Cardiology<br/> Liang, Yan; Department of Cardiology, Maoming People's Hospital, Maoming, Guangdong, 525000 China<br/> Hu, Yu-Ying; Department of Cardiology, First People's Hospital of Kashgar, Kashgar, Xinjiang 844099, China Sciences, Guangzhou, Guangdong, China<br/> Zhou, Yingling; Guangdong Cardiovascular Institute<br/> chen, zhujun; Guangdong Cardiovascular Institute<br/> Tan, Ning; Guangdong Cardiovascular Institute, Guangdong provincial Key Laboratory of Coronary Heart Disease Prevention, Guangdong General Hospital, Guangdong Academy of Medical Sciences, Cardiology<br/> Chen, Ji-yan; Guangdong Cardiovascular Institute, Guangdong provincial Key Laboratory of Coronary Heart Disease Prevention, Guangdong General Hospital, Guangdong Academy of Medical Sciences, Cardiology</p> |
| Keywords:                     | Coronary angiography, risk factor, contrast-induced nephropathy                                                                                                                                                                                                                                                                                                                                                                                                                                                                                                                                                                                                                                                                                                                                                                                                                                                                                                                                                                                                                                                                                                                                                                                                                                                                                                                                                                                                                                                                                                                                                                                                                                                                                                                                                                                                                                                                                                                                                                                                                                   |

1  
2  
3  
4  
5  
6  
7  
8  
9  
10  
11  
12  
13  
14  
15  
16  
17  
18  
19  
20  
21  
22  
23  
24  
25  
26  
27  
28  
29  
30  
31  
32  
33  
34  
35  
36  
37  
38  
39  
40  
41  
42  
43  
44  
45  
46  
47  
48  
49  
50  
51  
52  
53  
54  
55  
56  
57  
58  
59  
60

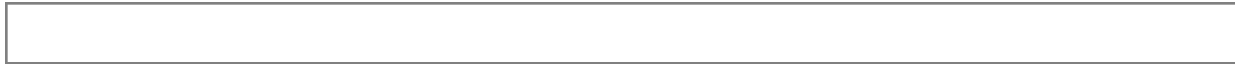

SCHOLARONE™  
Manuscripts

# Important Risk Factors for Contrast-Induced Nephropathy: Protocol for Systematic Review and Meta-analysis

Yong Liu<sup>1§\*</sup>, Xingchen Liang<sup>1,2§</sup>, Shaojun Xing<sup>1,2§</sup>, Jin Liu<sup>1§</sup>, Guoli Sun<sup>1§</sup>, Shiqun Chen<sup>1§</sup>, Xiaolin Cen<sup>1,2§</sup>, Xiaohua Dai<sup>1,2§</sup>, Yibo He<sup>1</sup>, Feier Song<sup>1</sup>, Yan, Liang<sup>3</sup>, Yuying Hu<sup>4</sup>, Yingling Zhou<sup>1,5</sup>, Zhujun Chen<sup>1</sup>, Ning Tan<sup>1</sup>, Jiyan Chen<sup>1\*</sup>

<sup>1</sup>Department of Cardiology, Guangdong provincial Key Laboratory of Coronary Heart Disease Prevention, Guangdong Cardiovascular Institute, Guangdong General Hospital, Guangdong Academy of Medical Sciences, Guangzhou, Guangdong, 510000, China

<sup>2</sup>Guangdong Pharmaceutical University, Guangzhou, Guangdong, 510006, China

<sup>3</sup>Department of Cardiology, Maoming People's Hospital, Maoming, Guangdong, 525000 China

<sup>4</sup>Department of Cardiology, First People's Hospital of Kashgar, Kashgar, Xinjiang 844099, China

<sup>5</sup>Guangdong General Hospital Zhuhai Hospital (Zhuhai Golden Bay Center Hospital, Zhuhai), Guangdong, 519040, China

Corresponding Author:

Yong Liu, PhD, MD<sup>a</sup>, and Ning Tan PhD, MD<sup>a</sup>, Jiyan Chen, PhD, MD<sup>a</sup>, FACC, FESC,

<sup>a</sup>Department of Cardiology, Guangdong provincial Key Laboratory of Coronary Heart Disease

1  
2  
3  
4 Prevention, Guangdong Cardiovascular Institute, Guangdong General Hospital, Guangdong Academy  
5  
6 of Medical Sciences, Guangzhou, Guangdong, 510000, China;  
7  
8

9  
10 E-mail: liuyong2099@126.com (YL), chenjiyandr@126.com (JYC) and tanning100@126.com (NT)  
11  
12  
13  
14  
15  
16  
17

## 18 **Abstract**

19  
20 **Introduction:** Identifying the patients who are at risk for contrast-induced  
21  
22 nephropathy (CIN) is a valuable component for the targeted prevention strategies. The  
23  
24 absolute and relative importance of risk factors over another has not been  
25  
26 systematically evaluated, let alone new, controversial or modifiable risk factors of  
27  
28 CIN.  
29

30  
31  
32  
33 **Methods and analysis:** According to MEDLINE, Embase, and Cochrane Central  
34  
35 databases of Systematic Reviews, we performed systematic review and meta analysis  
36  
37 to assess the important risk factors, including modifiable, new and controversial ones  
38  
39 for developing CIN, defined as an increase in serum creatinine after exposure to  
40  
41 contrast media. The secondary endpoint is all-cause mortality. Two authors will then  
42  
43 independently screen studies that meet the criteria for inclusion, consulting with a  
44  
45 third author to resolve any dispute. The quality of the included studies will be  
46  
47 assessed according to the Newcastle-Ottawa scale.  
48  
49

50  
51 **Ethics and dissemination:** Ethics approval in this systematic review and  
52  
53 meta-analysis protocol is not needed. We will disseminate the findings of this  
54  
55 systematic review and meta-analysis via publications in peer-reviewed journals.  
56

57 PROSPERO register number: CRD42019121534  
58  
59  
60

1  
2  
3  
4  
5  
6 **Abbreviations:** CIN=contrast induced nephropathy; GRADE=Grades of  
7 Recommendation, Assessment, Development and Evaluation; MACE=major adverse  
8 cardiovascular events; STEMI=ST-segment elevation myocardial infarction.  
9

10  
11  
12  
13 **Keywords:** Coronary angiography; risk factor; contrast-induced nephropathy.  
14  
15  
16  
17

### 18 **Strengths and limitations of this study**

19  
20  
21 This will be the first and largest comprehensive, systematic review of diverse risk  
22 factors associated with contrast-induced nephropathy (CIN).  
23  
24

25  
26 The broad search strategy will identify clearly identify important risk factors of CIN  
27 to preferentially supply target prevention strategies, infrequently reported risk factors  
28 and identify new strategies to predict risk of CIN.  
29  
30

31  
32  
33 This study will also systematic evaluate modifiable, new and controversial factors,  
34 which may be the potential preventive target in the future.  
35  
36

37  
38 This study will only identify English-language articles from the peer-reviewed  
39 literature.  
40  
41  
42  
43  
44

### 45 **Introduction**

46  
47 Contrast-induced nephropathy (CIN) has been reported to be associated with poor  
48 clinical outcomes including an increased short and long-term mortality, prolonging  
49 the duration of hospital stays, the need for renal replacement therapy, and an increase  
50 in major adverse cardiac events<sup>1,2</sup>. Critical predisposing factors for CIN include older  
51 age, preexisting renal failure, hemodynamic instability, congestive heart failure,  
52 diabetes mellitus, anemia, and the volume of contrast media<sup>3,4</sup>. Allen and Silve et al.<sup>5,6</sup>  
53 did systematically evaluation for current predict models for CIN, but there has been  
54  
55  
56  
57  
58  
59  
60

1  
2  
3  
4 no systematic assessment absolute and relative importance of risk factors over  
5 another, let alone new, controversial risk factors of CIN.  
6  
7

8 To address this deficit in knowledge, we conducted a systematic review and a  
9 meta-analysis of the observational studies that examined the absolute and relative  
10 importance of risk factors of CIN.  
11  
12  
13  
14  
15  
16

## 17 **Objectives**

18 The objective of this study is to identify the relationship between multiple risk factors  
19 and CIN. More specifically, the goals of this study are the following:  
20  
21  
22

- 23 1. To comprehensively and systematically assess the absolute and relative importance  
24 of current common risk factors for CIN;  
25  
26
- 27 2. To systematically assess the new, controversial risk factors for CIN.  
28  
29  
30  
31

## 32 **Method**

### 33 ***Patient and public involvement***

34 This is a protocol for meta analysis and it was not appropriate or possible to involve  
35 patients or the public in this work.  
36  
37

### 38 ***Search strategy***

39 A systematic computer-aided search of related studies was conducted in the following  
40 manner:  
41  
42

- 43 1. Ovid MEDLINE;
- 44 2. Ovid Embase;
- 45 3. Cochrane Database of Systematic Reviews.>

### 46 ***Initial keywords***

47 The databases will be searched using the following initial keyword search terms:  
48  
49  
50  
51  
52  
53  
54  
55  
56  
57  
58  
59  
60

1  
2  
3  
4 coronary angiography; angiocardiograph; contrast medium; radiocontrast medium;  
5 acute kidney injury ; contrast-induced nephropathy ; risk factor ; risk Assessment.  
6  
7 We will search the databases we choose from the present with restrictions on the  
8 English language of publication. If we find additional relevant keywords during any  
9 of the electronic searches or others, we will modify the electronic search strategies to  
10 upgrade these terms and document the changes.  
11  
12  
13  
14  
15  
16  
17

### 18 **Types of studies**

19  
20 We will include all observational studies (registries, cohorts, etc.) analyzing the  
21 correlation between risk factors and CIN following procedures with contrast media.  
22 This review will also consider experimental and epidemiological study designs,  
23 including case-control and cohort studies as being appropriate for inclusion in the  
24 meta-analysis. However, we will exclude articles related to animal experiments.  
25  
26  
27  
28  
29  
30  
31  
32  
33

### 34 **Types of participants**

35 We will include adults aged 18 years and above, identified with the CIN.  
36  
37  
38  
39  
40  
41  
42

### 43 **Types of outcomes**

#### 44 *Primary outcome*

45  
46 The primary endpoint is CIN, defined as an increase in serum creatinine after  
47 exposure to contrast media.  
48  
49  
50  
51  
52

#### 53 *Secondary outcome*

54  
55 Long-term all-cause mortality is defined as death from any cause within the follow-up  
56 time of patient's post-index procedure.  
57  
58  
59  
60



## Selection of studies

We will filter all retrieved articles. Two authors (XCL and SJX) will browse the title and abstract independently, and the two authors will record the exclude documents and the reasons for the exclusion. If there is a dispute in the process of the screening of the article, there will be a third author (LY) to arbitrate. After the initial screening, the two authors will then read the full text and further filter the articles according to the inclusion and exclusion criteria mentioned above. The same queue of the population will be treated as the same study and then excluded. In the process of reading the full text, if there is doubt in the selection, the two authors (XCL and SJX) will discuss it. If it cannot be resolved, there will be a third author (LY) to arbitrate. Finally, all selected articles will be listed for further analysis, and the excluded articles will be classified according to the reasons for exclusion.

## Quality assessment/assessment of the risk of bias in included studies

Two authors will independently assess the quality of selected articles using the *Newcastle-Ottawa Scale*<sup>7</sup>.

### *Observational studies using Newcastle-Ottawa Scale:*

#### CASE-CONTROL STUDIES

##### Selection

- 1) Is the Case Definition Adequate?
- 2) Representativeness of the Cases
- 3) Selection of Controls
- 4) Definition of Controls

1  
2  
3 Comparability  
4

- 5  
6 1) Comparability of Cases and Controls on the Basis of the Design or Analysis  
7

8 Exposure  
9

- 10 1) Ascertainment of Exposure  
11

- 12 2) Non-Response Rate  
13

14 COHORT STUDIES  
15

16 Selection  
17

- 18 1) Representativeness of the Exposed Cohort  
19

- 20 2) Selection of the Non-Exposed Cohort  
21

- 22 3) Ascertainment of Exposure  
23

- 24 4) Demonstration That Outcome of Interest Was Not Present at Start of Study  
25  
26  
27

28 Comparability  
29

- 30 1) Comparability of Cohorts on the Basis of the Design or Analysis  
31  
32

33 Outcome  
34

- 35 1) Assessment of Outcome  
36

- 37 2) Was Follow-Up Long Enough for Outcomes to Occur  
38

- 39 3) Adequacy of Follow Up of Cohorts  
40  
41  
42  
43  
44  
45

46 We will rate each selected article with a rating of low, high or unclear and the results  
47 will be presented in the form of a table. Unpublished data will be considered in the  
48 evaluation of the publication bias, and we will try to contact the author for assistance  
49 in this regard.  
50  
51  
52  
53  
54  
55

56  
57 **Data synthesis:**  
58

59 We will use STATA Ver13.0 software and RevMan for data analysis, and risk factor  
60

1  
2  
3  
4 effect sizes will be expressed as an odds ratio and their 95% CI. Using standard  
5  
6 chi-square test to assess the heterogeneity and variable statistics, we will perform  
7  
8 subgroup analysis to conduct data statistics. If there is data that cannot be counted in  
9  
10 the selected article, the data will be listed in the form of a table or chart. EndNote will  
11  
12 be used for managing references.

13  
14 Sensitivity analysis. We will perform sensitivity analyses in order to explore the  
15  
16 influence of the following factors on effect sizes.

- 17  
18 1. Restricting the analysis to studies for coronary angiography.
- 19  
20 2. Restricting the analysis to large cohort studies with more than 1000 subjects.

### 21 22 23 24 **Conclusion:**

25  
26  
27 The goal of this systematic review and meta-analysis is to clearly identify important  
28  
29 risk factors of CIN to preferentially supply target prevention strategies, including  
30  
31 contrast limiting and hydration, for those high risk factors<sup>8,9,10</sup>. In addition modifiable,  
32  
33 new and controversial factors may be the potential preventive target in the future.

### 34 35 36 37 38 **Author affiliations**

### 39 40 41 **Contributions**

42  
43  
44 Yong Liu, Xingchen Liang, Shaojun Xing, Jin Liu, Guoli Sun, Shiqun Chen, Xiaolin  
45  
46 Cen, Xiaohua Dai, Yibo He, Feier Song, Yan Liang, Yuying Hu, Yingling Zhou,  
47  
48 Zhujun Chen, Ning Tan, Jiyan Chen: conception and design of the work; Yong Liu,  
49  
50 Xingchen Liang, Shaojun Xing, Xiaolin Cen, Xiaohua Dai: determining search terms,  
51  
52 related literature search; Yong Liu, Xingchen Liang, Shaojun Xing, Jin Liu, Guoli  
53  
54 Sun, Shiqun Chen, Xiaolin Cen, Xiaohua Dai, Yibo He, Feier Song: filter literature  
55  
56 according to established standards; Yan Liang, Yuying Hu, Yingling Zhou, Zhujun  
57  
58 Chen, Ning Tan, Jiyan Chen: as a third author, judge the doubtful literature; Yong  
59  
60 Liu, Shiqun Chen: acquisition, analysis, or interpretation of data; Yong Liu, Shiqun Chen,

1  
2  
3  
4 Jiyang Chen, Yong Liu, Ning Tan: drafting the work or revising it critically for important  
5 intellectual content. All authors agree that this is the final version of the article. All authors agreed  
6 to be accountable for all aspects of the work in ensuring that questions related to the accuracy or  
7 integrity of any part of the work are appropriately investigated and resolved.  
8  
9  
10

### 11 ***Competing interests***

12  
13  
14  
15 The authors declare no competing interests.  
16

### 17 ***Funding***

18  
19  
20 The study is supported by the Science and Technology Planning Project of  
21 Guangdong Province (grant no. 2014B070706010), The Technology Planning Project  
22 of Dongguan Province (grant no. 2015108101022), The National Science Foundation  
23 for Young Scientists of China (grant no. 81500520) and The Progress in Science and  
24 Technology Project of Guangdong Province (grant no. 2015A030302037) .  
25  
26  
27  
28  
29

### 30 ***Data sharing statement***

31  
32 All authors will share all data.  
33  
34  
35  
36  
37  
38  
39

### 40 **References**

- 41  
42 1. Tsai TT, Patel UD, Chang TI, Kennedy KF, Masoudi FA, Matheny ME, Kosiborod  
43 M, Amin AP, Messenger JC, Rumsfeld JS, Spertus JA. Contemporary incidence,  
44 predictors, and outcomes of acute kidney injury in patients undergoing percutaneous  
45 coronary interventions: insights from the NCDR Cath-PCI registry. *JACC Cardiovasc*  
46 *Interv.* 2014 Jan;7(1):1-9.  
47  
48  
49  
50  
51  
52 2. James MT, Samuel SM, Manning MA, Tonelli M, Ghali WA, Faris P, Knudtson  
53 ML, Pannu N, Hemmelgarn BR. Contrast-induced acute kidney injury and risk of  
54 adverse clinical outcomes after coronary angiography: a systematic review and  
55 meta-analysis. *Circ Cardiovasc Interv.* 2013 Feb;6(1):37-43.  
56  
57  
58  
59  
60

- 1  
2  
3  
4 3. Mehran R, Aymong ED, Nikolsky E, et al. A simple risk score for prediction of  
5 contrast-induced nephropathy after percutaneous coronary intervention: development  
6 and initial validation. *J Am Coll Cardiol*. 2004;44:1393–1399.  
7  
8
- 9  
10 4. Gurm HS, Seth M, Kooiman J, Share D. A novel tool for reliable and accurate  
11 prediction of renal complications in patients undergoing percutaneous coronary  
12 intervention. *J Am Coll Cardiol*. 2013 Jun 4;61(22):2242-8.  
13  
14
- 15 5. Allen DW, Ma B, Leung KC, Graham MM, Pannu N, Traboulsi M, Goodhart D,  
16 Knudtson ML, James MT. Risk Prediction Models for Contrast-Induced Acute  
17 Kidney Injury Accompanying Cardiac Catheterization: Systematic Review and  
18 Meta-analysis. *Can J Cardiol*. 2017 Jun;33(6):724-736.  
19  
20
- 21 6. Silver SA, Shah PM, Chertow GM, Harel S, Wald R, Harel Z. Risk prediction  
22 models for contrast induced nephropathy: systematic review. *BMJ*. 2015 Aug  
23 27;351:h4395. doi: 10.1136/bmj.h4395.  
24  
25
- 26 7. Wells GA, Shea B, O'Connell D, Peterson J, Welch V, Losos M, Tugwell P. The  
27 Newcastle-Ottawa Scale (NOS) for assessing the quality of nonrandomised studies in  
28 meta-analyses [webpage on the Internet] Ottawa, ON: Ottawa Hospital Research  
29 Institute; 2011. [Accessed February 5, 2013]. Available  
30 from: [http://www.ohri.ca/programs/clinical\\_epidemiology/oxford.asp](http://www.ohri.ca/programs/clinical_epidemiology/oxford.asp).  
31  
32
- 33 8. Liu Y, Chen JY, Tan N, Liu Y, Chen JY, Tan N, Zhou YL, Yu DQ, Chen ZJ, He  
34 YT, Liu YH, Luo JF, Huang WH, Li G, He PC, Yang JQ, Xie NJ, Liu XQ, Yang DH,  
35 Huang SJ, Piao-Ye, Li HL, Ran P, Duan CY, Chen PY. Safelimits of contrast vary  
36 with hydration volume for prevention of contrast-induced nephropathy after coronary  
37 angiography among patients with a relatively low risk of contrast-induced  
38 nephropathy. *Circ Cardiovasc Interv* 2015;8.pii: e001859.  
39  
40
- 41 9. Briguori C, Signoriello G. Acute kidney injury: Intravenous hydration for the  
42 prevention of CIAKI. *Nat Rev Nephrol*. 2017 May;13(5):264-266.  
43  
44  
45  
46  
47  
48  
49  
50  
51  
52  
53  
54  
55  
56  
57  
58  
59  
60

1  
2  
3  
4 10. Brar SS, Aharonian V, Mansukhani P, Moore N, Shen AY, Jorgensen M, Dua A,  
5 Short L, Kane K. Haemodynamic-guided fluid administration for the prevention of  
6 contrast-induced acute kidney injury: the POSEIDON randomised controlled trial.  
7  
8 Lancet. 2014 May 24;383(9931):1814-23.  
9  
10  
11  
12  
13  
14  
15  
16  
17  
18  
19  
20  
21  
22  
23  
24  
25  
26  
27  
28  
29  
30  
31  
32  
33  
34  
35  
36  
37  
38  
39  
40  
41  
42  
43  
44  
45  
46  
47  
48  
49  
50  
51  
52  
53  
54  
55  
56  
57  
58  
59  
60

For peer review only

# BMJ Open

## Risk factors for contrast-induced acute kidney injury (CI-AKI): Protocol for systematic review and meta-analysis

|                                 |                                                                                                                                                                                                                                                                                                                                                                                                                                                                                                                                                                                                                                                                                                                                                                                                                                                                                                                                                                                                                                                                                                                                                                                                                                                                                                                                                                                                                                                                                                                                                                                                                                                                                                                                                                                                                                                                                                                                                                                                                                                                                                   |
|---------------------------------|---------------------------------------------------------------------------------------------------------------------------------------------------------------------------------------------------------------------------------------------------------------------------------------------------------------------------------------------------------------------------------------------------------------------------------------------------------------------------------------------------------------------------------------------------------------------------------------------------------------------------------------------------------------------------------------------------------------------------------------------------------------------------------------------------------------------------------------------------------------------------------------------------------------------------------------------------------------------------------------------------------------------------------------------------------------------------------------------------------------------------------------------------------------------------------------------------------------------------------------------------------------------------------------------------------------------------------------------------------------------------------------------------------------------------------------------------------------------------------------------------------------------------------------------------------------------------------------------------------------------------------------------------------------------------------------------------------------------------------------------------------------------------------------------------------------------------------------------------------------------------------------------------------------------------------------------------------------------------------------------------------------------------------------------------------------------------------------------------|
| Journal:                        | <i>BMJ Open</i>                                                                                                                                                                                                                                                                                                                                                                                                                                                                                                                                                                                                                                                                                                                                                                                                                                                                                                                                                                                                                                                                                                                                                                                                                                                                                                                                                                                                                                                                                                                                                                                                                                                                                                                                                                                                                                                                                                                                                                                                                                                                                   |
| Manuscript ID                   | bmjopen-2019-030048.R1                                                                                                                                                                                                                                                                                                                                                                                                                                                                                                                                                                                                                                                                                                                                                                                                                                                                                                                                                                                                                                                                                                                                                                                                                                                                                                                                                                                                                                                                                                                                                                                                                                                                                                                                                                                                                                                                                                                                                                                                                                                                            |
| Article Type:                   | Protocol                                                                                                                                                                                                                                                                                                                                                                                                                                                                                                                                                                                                                                                                                                                                                                                                                                                                                                                                                                                                                                                                                                                                                                                                                                                                                                                                                                                                                                                                                                                                                                                                                                                                                                                                                                                                                                                                                                                                                                                                                                                                                          |
| Date Submitted by the Author:   | 05-Jun-2019                                                                                                                                                                                                                                                                                                                                                                                                                                                                                                                                                                                                                                                                                                                                                                                                                                                                                                                                                                                                                                                                                                                                                                                                                                                                                                                                                                                                                                                                                                                                                                                                                                                                                                                                                                                                                                                                                                                                                                                                                                                                                       |
| Complete List of Authors:       | <p>Liu, Yong; Guangdong Cardiovascular Institute<br/> Liang, Xingcheng; Guangdong Cardiovascular Institute; School of Pharmacy, Guangdong Pharmaceutical University, Guangzhou, 510000, Guangdong, China<br/> Xin, Shaojun; Guangdong General Hospital; School of Pharmacy, Guangdong Pharmaceutical University, Guangzhou, 510000, Guangdong, China<br/> Liu, Jin; Guangdong General Hospital,<br/> Sun, Guo-li; Guangdong Cardiovascular Institute, cardiology<br/> Chen, Shi-qun; Guangdong Cardiovascular Institute, Guangdong provincial Key Laboratory of Coronary Heart Disease Prevention, Guangdong General Hospital, Guangdong Academy of Medical Sciences, Cardiology<br/> cen, xiaolin; Guangdong Cardiovascular Institute; School of Pharmacy, Guangdong Pharmaceutical University, Guangzhou, 510000, Guangdong, China<br/> dai, xiaohua; Guangdong Cardiovascular Institute; School of Pharmacy, Guangdong Pharmaceutical University, Guangzhou, 510000, Guangdong, China<br/> He, Yibo; Guangdong Cardiovascular Institute,<br/> Song, Feier; Department of Cardiology, Provincial Key Laboratory of Coronary Heart Disease, Guangdong Cardiovascular Institute, Guangdong General Hospital, Guangdong Academy of Medical Sciences, Guangzhou 510100, China, Cardiology<br/> Liang, Yan; Department of Cardiology, Maoming People's Hospital, Maoming, Guangdong, 525000 China<br/> Hu, Yu-Ying; Department of Cardiology, First People's Hospital of Kashgar, Kashgar, Xinjiang 844099, China Sciences, Guangzhou, Guangdong, China<br/> Zhou, Yingling; Guangdong Cardiovascular Institute<br/> chen, zhujun; Guangdong Cardiovascular Institute<br/> Tan, Ning; Guangdong Cardiovascular Institute, Guangdong provincial Key Laboratory of Coronary Heart Disease Prevention, Guangdong General Hospital, Guangdong Academy of Medical Sciences, Cardiology<br/> Chen, Ji-yan; Guangdong Cardiovascular Institute, Guangdong provincial Key Laboratory of Coronary Heart Disease Prevention, Guangdong General Hospital, Guangdong Academy of Medical Sciences, Cardiology</p> |
| <b>Primary Subject Heading</b>: | Cardiovascular medicine                                                                                                                                                                                                                                                                                                                                                                                                                                                                                                                                                                                                                                                                                                                                                                                                                                                                                                                                                                                                                                                                                                                                                                                                                                                                                                                                                                                                                                                                                                                                                                                                                                                                                                                                                                                                                                                                                                                                                                                                                                                                           |

1  
2  
3  
4  
5  
6  
7  
8  
9  
10  
11  
12  
13  
14  
15  
16  
17  
18  
19  
20  
21  
22  
23  
24  
25  
26  
27  
28  
29  
30  
31  
32  
33  
34  
35  
36  
37  
38  
39  
40  
41  
42  
43  
44  
45  
46  
47  
48  
49  
50  
51  
52  
53  
54  
55  
56  
57  
58  
59  
60

|                            |                                                                 |
|----------------------------|-----------------------------------------------------------------|
| Secondary Subject Heading: | Cardiovascular medicine                                         |
| Keywords:                  | Coronary angiography, risk factor, contrast-induced nephropathy |
|                            |                                                                 |

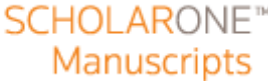



1  
2  
3  
4  
5 **Risk factors for contrast-induced acute kidney injury (CI-AKI):**  
6  
7  
8 **Protocol for systematic review and meta-analysis**  
9

10  
11  
12  
13 Yong Liu<sup>1§</sup>, Xingchen Liang<sup>1,2§</sup>, Shaojun Xin<sup>1,2§</sup>, Jin Liu<sup>1§</sup>, Guoli Sun<sup>1§</sup>, Shiqun  
14  
15 Chen<sup>1§</sup>, Xiaolin Cen<sup>1,2§</sup>, Xiaohua Dai<sup>1,2§</sup>, Yibo He<sup>1</sup>, Feier Song<sup>1</sup>, Yan, Liang<sup>3</sup>, Yuying  
16  
17 Hu<sup>4</sup>, Yingling Zhou<sup>1,5</sup>, Zhujun Chen<sup>1</sup>, Ning Tan<sup>1\*</sup>, Jiyan Chen<sup>1\*</sup>  
18  
19

20  
21 <sup>1</sup>Department of Cardiology, Guangdong provincial Key Laboratory of Coronary Heart Disease  
22  
23 Prevention, Guangdong Cardiovascular Institute, Guangdong General Hospital, Guangdong Academy  
24  
25 of Medical Sciences, Guangzhou, Guangdong, 510000, China  
26  
27

28  
29 <sup>2</sup>Guangdong Pharmaceutical University, Guangzhou, Guangdong, 510006, China  
30

31  
32 <sup>3</sup>Department of Cardiology, Maoming People's Hospital, Maoming, Guangdong, 525000 China  
33

34  
35 <sup>4</sup>Department of Cardiology, First People's Hospital of Kashgar, Kashgar, Xinjiang 844099, China  
36

37  
38 <sup>5</sup>Guangdong General Hospital Zhuhai Hospital (Zhuhai Golden Bay Center Hospital, Zhuhai),  
39  
40 Guangdong, 519040, China  
41

42  
43  
44 Corresponding Authors:  
45

46  
47 Jiyan Chen, PhD, MD<sup>a</sup>, FACC, FESC and Ning Tan PhD, MD<sup>a</sup>  
48

49  
50 Department of Cardiology, Guangdong Provincial Key Laboratory of Coronary Heart Disease  
51  
52 Prevention, Guangdong Cardiovascular Institute, Guangdong General Hospital, Guangdong Academy  
53  
54 of Medical Sciences, Guangzhou, Guangdong, 510000, China;  
55

56  
57 E-mail: chenjiyandr@126.com (JYC), and tanning100@126.com (NT)  
58  
59  
60

## Abstract

**Introduction:** Identifying the patients who are at risk for contrast-induced acute kidney injury (CI-AKI), which is defined as an increase in serum creatinine after exposure to contrast media, is a critical step in targeted prevention strategies. The absolute and relative importance of individual risk factors have not been systematically evaluated, let alone the new, controversial, and modifiable risk factors of CI-AKI.

**Methods and analysis:** On December 17<sup>th</sup>, 2018, a search was performed on MEDLINE, Embase, and the Cochrane Database of Systematic Reviews. We will perform a systematic review and meta-analysis to assess the important risk factors for developing CI-AKI, including those new, modifiable factors which are considered controversial. The secondary endpoint will be all-cause mortality. Two authors will then independently screen studies that meet the criteria for inclusion, consulting with a third author to resolve any dispute. The quality of the included studies will be assessed according to the Newcastle-Ottawa scale.

**Ethics and dissemination:** Ethics approval in this systematic review and meta-analysis protocol is not needed. We will disseminate the findings of this systematic review and meta-analysis via publications in peer-reviewed journals.

PROSPERO register number: CRD42019121534

**Abbreviations:** CI-AKI = contrast-induced acute kidney injury; GRADE = Grades of Recommendation, Assessment, Development and Evaluation; MACE = major adverse cardiovascular events; STEMI = ST-segment elevation myocardial infarction.

**Keywords:** Coronary angiography; risk factor; contrast-induced nephropathy.

### **Strengths and limitations of this study**

This will be the first, and largest, comprehensive systematic review of the diverse risk factors associated with CI-AKI.

Our broad search strategy will identify the important risk factors for CI-AKI for the purpose of preferentially supplying target prevention strategies, bringing attention to infrequently reported risk factors, and identifying new strategies to predict the risk of CI-AKI.

This study will also evaluate the new, modifiable risk factors, which are still considered controversial but may hold promise as preventive targets in the future.

This study will only select English-language articles from the peer-reviewed literature.

## Introduction

Contrast-induced acute kidney injury (CI-AKI) has been reported to be associated with poor clinical outcomes including increased short and long-term mortality, prolonged duration of hospital stay, the need for renal replacement therapy, and an increase in major adverse cardiac events<sup>1,2</sup>. The use of a risk prediction tool for CI-AKI could have several benefits. Primarily, it may help identify those patients at high risk for the disorder who might benefit from perioperative strategies that protect the kidneys. Critical predisposing factors for CI-AKI include older age, preexisting renal failure, hemodynamic instability, congestive heart failure, diabetes mellitus, anemia, and the volume of contrast media<sup>3,4</sup>. Although Allen et al.<sup>5</sup> and Silver et al.<sup>6</sup> systematically evaluated the current predictive models for CI-AKI, there has been no systematic assessment of the absolute and relative importance of the individual risk factors for CI-AKI, let alone, the new, modifiable, and controversial ones. This will be the first, and largest systematic review about the risk factors associated with CI-AKI.

To address this deficit in knowledge, we will conduct a systematic review and a meta-analysis of the observational studies that have examined the absolute and relative importance of the risk factors of CI-AKI.

## Objectives

The objective of this study is to identify the relationship between the multiple risk factors of CI-AKI. More specifically, the goals of this study are the following:

1. To comprehensively and systematically assess the absolute and relative importance of the current common risk factors for CI-AKI
2. To systematically assess the new, controversial risk factors for CI-AKI

## Method

### *Patient and public involvement*

This is a protocol for a meta-analysis, and it will be not appropriate or possible to involve patients or the public in this work.

### ***Search strategy***

A systematic computer-aided search of related studies will be conducted in the following databases:

1. Ovid MEDLINE
2. Ovid Embase
3. Cochrane Database of Systematic Reviews

### ***Initial keywords***

The databases will be searched using the following initial keyword search terms: coronary angiography; angiocardiograph; contrast medium; radiocontrast medium; acute kidney injury; contrast-induced nephropathy; acute renal insufficiency; risk factor; risk assessment; multivariate analysis; multivariable logistic regression; models. We will restrict the search on the databases to English language publications. If we find additional relevant keywords during any of the electronic searches, we will update the electronic search strategies with these terms and document the changes (details in Supplement).

### **Types of studies**

We will include all observational studies (registries, cohorts, etc.) that analyze the correlation between risk factors and CI-AKI following procedures with contrast media. This review will also consider experimental and epidemiological study designs, including case-control and cohort studies, as being appropriate for inclusion in the meta-analysis. However, we will exclude articles related to animal experiments.

### **Types of participants**

We will include adults identified with the CI-AKI who are aged 18 years and above.

### **Types of outcomes**

#### ***Primary outcome***

The primary endpoint will be CI-AKI, defined as an increase in serum creatinine after exposure to contrast media.

### ***Secondary outcome***

The secondary endpoint will be long-term all-cause mortality, defined as death from any cause within the follow-up time of patient's post-index procedure.

### **Selection of studies**

We will filter all retrieved articles. Two authors (XCL and SJX) will browse the titles and abstracts independently, and will record the excluded documents and the reasons for the exclusion. If there is a dispute in the process of the screening of the article, there will be a third author (YL) to arbitrate. After the initial screening, the two authors (GLS and JY) will then read the full text and further filter the articles according to the inclusion and exclusion criteria mentioned above. To avoid overlapping patient data in duplicate publications, registry analyses will be cross-checked with institutional studies and compared with other registry studies, and the larger or more complete publication will be included. In the process of reading the full text, if there is doubt in the selection, the two authors (XCL and SJX) will discuss it. If it cannot be resolved, there will be a third author (LY) to arbitrate. Finally, all selected articles will be listed for further analysis, and the excluded articles will be classified according to the reasons for exclusion.

### **Quality assessment/assessment of the risk of bias in included studies**

Two authors will independently assess the quality of selected articles using the *Newcastle-Ottawa Scale*<sup>7</sup>.

#### ***Observational studies using Newcastle-Ottawa Scale:***

##### **CASE-CONTROL STUDIES**

###### **Selection**

- 1) Is the Case Definition Adequate?
- 2) Representativeness of the Cases
- 3) Selection of Controls
- 4) Definition of Controls

###### **Comparability**

- 1) Comparability of Cases and Controls on the Basis of the Design or Analysis

###### **Exposure**

- 1) Ascertainment of Exposure

1  
2  
3 2) Non-Response Rate

4 COHORT STUDIES

5 Selection

6  
7 1) Representativeness of the Exposed Cohort

8 2) Selection of the Non-Exposed Cohort

9 3) Ascertainment of Exposure

10 4) Demonstration That Outcome of Interest Was Not Present at Start of Study

11 Comparability

12 1) Comparability of Cohorts on the Basis of the Design or Analysis

13 Outcome

14 1) Assessment of Outcome

15 2) Was Follow-Up Long Enough for Outcomes to Occur

16 3) Adequacy of Follow-Up of Cohorts

17 We will rate each selected article with a rating of low, high, or unclear, and the results  
18 will be presented in the form of a table. Unpublished data will be considered in the  
19 evaluation of the publication bias, and we will try to contact the author for assistance  
20 in this regard. In addition, we will use the Risk of Bias in Nonrandomized studies of  
21 Interventions tool (ROBINS-I)<sup>8</sup> to enhance the reproducibility and comparability of  
22 this review to future reviews of a similar topic.  
23  
24  
25  
26  
27  
28  
29  
30  
31

32 **Data synthesis:**

33 We will use STATA Ver13.0 software and RevMan for data analysis, and risk factor  
34 effect sizes will be expressed as an odds ratio and their 95% CI. Using standard  
35 chi-square test to assess the heterogeneity and variable statistics, we will perform  
36 subgroup analysis to conduct data statistics. If there are data that cannot be counted in  
37 the selected article, the data will be listed in the form of a table or chart. EndNote will  
38 be used for managing references.  
39

40 Sensitivity analysis. We will perform sensitivity analyses in order to explore the  
41 influence of the following factors on effect sizes:  
42

43 1. Restricting the analysis to studies of coronary angiography.

44 2. Restricting the analysis to large cohort studies with more than 1000 subjects.  
45  
46  
47  
48  
49  
50  
51  
52  
53  
54

55 **Conclusion:**

56 The goal of this systematic review and meta-analysis is to clearly identify the  
57 important risk factors for CI-AKI for the purpose of preferentially supplying target  
58  
59  
60

1  
2  
3  
4 prevention strategies, including contrast limiting and hydration for those high risk  
5 factors<sup>9-11</sup>. In addition, the modifiable, new, and controversial factors will also be  
6 evaluated, as they may have potential as preventive targets.  
7  
8  
9  
10  
11  
12  
13  
14

### 15 **Author affiliations**

#### 16 ***Contributions***

17  
18 Yong Liu, Xingchen Liang, Shaojun Xin, Jin Liu, Guoli Sun, Shiqun Chen, Xiaolin  
19 Cen, Xiaohua Dai, Yibo He, Feier Song, Yan Liang, Yuying Hu, Yingling Zhou,  
20 Zhujun Chen, Ning Tan, Jiyan Chen: conception and design of the work; Yong Liu,  
21 Xingchen Liang, Shaojun Xin, Xiaolin Cen, Xiaohua Dai: determining search terms,  
22 related literature search; Yong Liu, Xingchen Liang, Shaojun Xin, Jin Liu, Guoli Sun,  
23 Shiqun Chen, Xiaolin Cen, Xiaohua Dai, Yibo He, Feier Song: filter literature  
24 according to established standards; Yan Liang, Yuying Hu, Yingling Zhou, Zhujun  
25 Chen, Ning Tan, Jiyan Chen: as a third author, judge the doubtful literature; Yong Liu,  
26 Shiqun Chen, Xiaolin Cen, Xiaohua Dai, Yibo He, Feier Song: acquisition, analysis, or interpretation of data; Yong Liu, Shiqun Chen,  
27 Jiyan Chen, Yong Liu, Ning Tan: drafting the work or revising it critically for  
28 important intellectual content. All authors agree that this is the final version of the  
29 article. All authors agree to be accountable for all aspects of the work in ensuring that  
30 questions related to the accuracy or integrity of any part of the work are appropriately  
31 investigated and resolved.  
32  
33  
34  
35  
36  
37  
38  
39  
40  
41  
42  
43  
44  
45

#### 46 ***Competing interests***

47  
48 None declared  
49

#### 50 ***Funding***

51  
52 The study is supported by the Science and Technology Planning Project of  
53 Guangdong Province (grant no. 2014B070706010), The Technology Planning Project  
54 of Dongguan Province (grant no. 2015108101022), The National Science Foundation  
55 for Young Scientists of China (grant no. 81500520), and The Progress in Science and  
56 Technology Project of Guangdong Province (grant no. 2015A030302037) .  
57  
58  
59  
60



### ***Data sharing statement***

All authors will share all data.

### **References**

1. Tsai TT, Patel UD, Chang TI, Kennedy KF, Masoudi FA, Matheny ME, Kosiborod M, Amin AP, Messenger JC, Rumsfeld JS, Spertus JA. Contemporary incidence, predictors, and outcomes of acute kidney injury in patients undergoing percutaneous coronary interventions: insights from the NCDR Cath-PCI registry. *JACC Cardiovasc Interv.* 2014 Jan;7(1):1-9.
2. James MT, Samuel SM, Manning MA, Tonelli M, Ghali WA, Faris P, Knudtson ML, Pannu N, Hemmelgarn BR. Contrast-induced acute kidney injury and risk of adverse clinical outcomes after coronary angiography: a systematic review and meta-analysis. *Circ Cardiovasc Interv.* 2013 Feb;6(1):37-43.
3. Mehran R, Aymong ED, Nikolsky E, et al. A simple risk score for prediction of contrast-induced nephropathy after percutaneous coronary intervention: development and initial validation. *J Am Coll Cardiol.* 2004;44:1393–1399.
4. Gurm HS, Seth M, Kooiman J, Share D. A novel tool for reliable and accurate prediction of renal complications in patients undergoing percutaneous coronary intervention. *J Am Coll Cardiol.* 2013 Jun 4;61(22):2242-8.
5. Allen DW, Ma B, Leung KC, Graham MM, Pannu N, Traboulsi M, Goodhart D, Knudtson ML, James MT. Risk Prediction Models for Contrast-Induced Acute Kidney Injury Accompanying Cardiac Catheterization: Systematic Review and Meta-analysis. *Can J Cardiol.* 2017 Jun;33(6):724-736.
6. Silver SA, Shah PM, Chertow GM, Harel S, Wald R, Harel Z. Risk prediction models for contrast induced nephropathy: systematic review. *BMJ.* 2015 Aug 27;351:h4395. doi: 10.1136/bmj.h4395.

- 1  
2  
3  
4 7. Wells GA, Shea B, O'Connell D, Peterson J, Welch V, Losos M, Tugwell P. The  
5 Newcastle-Ottawa Scale (NOS) for assessing the quality of nonrandomised studies in  
6 meta-analyses [webpage on the Internet] Ottawa, ON: Ottawa Hospital Research  
7 Institute; 2011. [Accessed February 5, 2013]. Available  
8 from: [http://www.ohri.ca/programs/clinical\\_epidemiology/oxford.asp](http://www.ohri.ca/programs/clinical_epidemiology/oxford.asp).  
9  
10
- 11 8. Sterne Ac, Hernán M A, Reeves B C, et al. ROBINS-I: a tool for assessing risk of  
12 bias in non-randomised studies of interventions. *BMJ*, 2016, 355: i4919.  
13
- 14 9. Liu Y, Chen JY, Tan N, Liu Y, Chen JY, Tan N, Zhou YL, Yu DQ, Chen ZJ, He  
15 YT, Liu YH, Luo JF, Huang WH, Li G, He PC, Yang JQ, Xie NJ, Liu XQ, Yang DH,  
16 Huang SJ, Piao-Ye, Li HL, Ran P, Duan CY, Chen PY. Safelimits of contrast vary  
17 with hydration volume for prevention of contrast-induced nephropathy after coronary  
18 angiography among patients with a relatively low risk of contrast-induced  
19 nephropathy. *Circ Cardiovasc Interv* 2015;8.pii: e001859.  
20  
21
- 22 10. Briguori C, Signoriello G. Acute kidney injury: Intravenous hydration for the  
23 prevention of CIAKI. *Nat Rev Nephrol*. 2017 May;13(5):264-266.  
24  
25
- 26 11. Brar SS, Aharonian V, Mansukhani P, Moore N, Shen AY, Jorgensen M, Dua A,  
27 Short L, Kane K. Haemodynamic-guided fluid administration for the prevention of  
28 contrast-induced acute kidney injury: the POSEIDON randomised controlled trial.  
29 *Lancet*. 2014 May 24;383(9931):1814-23.  
30  
31  
32  
33  
34  
35  
36  
37  
38  
39  
40  
41  
42  
43  
44  
45  
46  
47  
48  
49  
50  
51  
52  
53  
54  
55  
56  
57  
58  
59  
60

## Draft MEDLINE and EMBASE search - Ovid interface

- 1
  - 2
  - 3
  - 4
  - 5
  - 6
  - 7
  - 8
  - 9
  - 10
  - 11
  - 12
  - 13
  - 14
  - 15
  - 16
  - 17
  - 18
  - 19
  - 20
  - 21
  - 22
  - 23
  - 24
  - 25
  - 26
  - 27
  - 28
  - 29
  - 30
  - 31
  - 32
  - 33
  - 34
  - 35
  - 36
  - 37
  - 38
  - 39
  - 40
  - 41
  - 42
  - 43
  - 44
  - 45
  - 46
  - 47
  - 48
  - 49
  - 50
  - 51
  - 52
  - 53
  - 54
  - 55
  - 56
  - 57
  - 58
  - 59
  - 60
- 1. exp Contrast Media/
  - 2. (contrast media or contrast medium or contrast material\$ or contrast agent\$ or contrast dye or radiographic contrast).ti,ab.
  - 3. (radiocontrast media or radiocontrast medium or radiocontrast agent\$).ti,ab.
  - 4. 1 or 2 or 3
  - 5. (nephritis or nephropath\$ or nephrotoxic\$).ti,ab.
  - 6. ((impair\$ or damag\$ or reduc\$ or injur\$ dysfunction\$ or failure) adj2 (renal or kidney)).ti,ab.
  - 7. exp Kidney Diseases/
  - 8. exp nephritis/ or diabetic nephropathies/
  - 9. exp renal insufficiency/
  - 10. acute kidney injury.ti,ab.
  - 11. acute kidney injur\*.ti,ab.
  - 12. acute kidney failure\*.ti,ab.
  - 13. Acute kidney insufficienc\*.ti,ab.
  - 14. contrast induced nephropathy
  - 15. contrast induced nephropath\*.ti,ab.
  - 16. contrast nephropath\*.ti,ab.
  - 17. contrast induced acute kidney injur\*.ti,ab.
  - 18. AKI.ti,ab.
  - 19. ARF.ti,ab.
  - 20. CIN.ti,ab.
  - 21. acute renal injur\*.ti,ab.
  - 22. acute renal failure\*.ti,ab.
  - 23. acute renal insufficienc\*.ti,ab.
  - 24. 5 or 6 or 7 or 8 or 9 or 10 or 11 or 12 or 13 or 14 or 15 or 16 or 17 or 18 or 19 or 20 or 21 or 22 or 23
  - 25. Risk Assessment/
  - 26. risk factors/

- 1  
2  
3  
4 -27. (risk adj3 model\*).ti,ab.  
5  
6 -28. score\*.ti,ab.  
7  
8 -29. Forecasting/  
9  
10 -30. prognostic factor\*.ti,ab.  
11  
12 -31. "Predictive Value of Tests"/  
13  
14 -32. predict\*.ti,ab.  
15  
16 -33. regression\*.ti,ab.  
17  
18 -34. (logistic adj2 model\*).ti,ab.  
19  
20 -35. multivariate analysis/  
21  
22 -36. multivariable logistic regression  
23  
24 -37. (multivariate adj3 analysis).ti,ab.  
25  
26 -38. sn.fs.  
27  
28 -39. exp mathematical concepts/  
29  
30 -40. exp Models, Biological/  
31  
32 -41. exp models, statistical/  
33  
34 -42. area under curve/  
35  
36 -43. algorithm\*.ti,ab.  
37  
38 -44. equation\*.ti,ab.  
39  
40 -45. 25 or 26 or 27 or 28 or 29 or 30 or 31 or 32 or 33 or 34 or 35 or 36 or 37 or 38 or  
41  
42 39 or 40 or 41 or 42 or 43 or 44  
43  
44 -46. 4 and 24 and 45  
45  
46 -47. remove duplicates from 46  
47  
48  
49 Draft Cochrane datebase search  
50  
51 -1. (contrast media or contrast medium or contrast material\$ or contrast agent\$ or  
52  
53 contrast dye or radiographic contrast).ti,ab.  
54  
55 -2. (radiocontrast media or radiocontrast medium or radiocontrast agent\$).ti,ab.  
56  
57 -3. (percutaneous coronary intervention or PCI or coronary angiograph or  
58  
59 angiography or catheter-proven or Angioplasty).ti,ab.  
60  
60 -4. 1 or 2 or 3

1  
2  
3  
4 -5. (nephritis or nephropath\$ or nephrotoxic\$).ti,ab.

5  
6 -6. ((impair\$ or damag\$ or reduc\$ or injur\$ dysfunction\$ or failure) adj2 (renal or  
7 kidney)).ti,ab.

8  
9  
10 -7. (Kidney Diseases or nephritis or diabetic nephropathies or renal insufficiency or  
11 acute kidney injury or acute kidney injur\* or acute kidney failure\* or Acute kidney  
12 insufficienc\* or contrast induced nephropathy or contrast induced nephropath\* or  
13 contrast nephropath\* or contrast induced acute kidney injur\* or AKI or ARF or CIN  
14 or acute renal injur\* or acute renal failure\* or acute renal insufficienc\* or creatinine  
15 or serum creatinine).ti,ab.

16  
17  
18  
19  
20  
21 -8. 5 or 6 or 7

22  
23 -9. ((risk adj3 model\*) or score\* or prognostic factor\* or predict\* or regression\* or  
24 (logistic adj2 model\*) or multivariable logistic regression or multivariable analyses or  
25 logistic regression or algorithm\* or equation\* or (multivariate adj3 analysis or  
26 Forecasting or "Predictive Value of Tests" or multivariate analysis or mathematical  
27 concepts or Models, Biological or models, statistical or area under curve)).ti,ab.

28  
29  
30  
31  
32  
33 -10. 4 and 8 and 9  
34  
35  
36  
37  
38  
39  
40  
41  
42  
43  
44  
45  
46  
47  
48  
49  
50  
51  
52  
53  
54  
55  
56  
57  
58  
59  
60

**PRISMA-P (Preferred Reporting Items for Systematic review and Meta-Analysis Protocols) 2015 checklist: recommended items to address in a systematic review protocol\***

| Section and topic                 | Item No | Checklist item                                                                                                                                                                                                                |
|-----------------------------------|---------|-------------------------------------------------------------------------------------------------------------------------------------------------------------------------------------------------------------------------------|
| <b>ADMINISTRATIVE INFORMATION</b> |         |                                                                                                                                                                                                                               |
| Title:                            |         |                                                                                                                                                                                                                               |
| Identification                    | 1a-P1   | Identify the report as a protocol of a systematic review                                                                                                                                                                      |
| Update                            | NO      | If the protocol is for an update of a previous systematic review, identify as such                                                                                                                                            |
| Registration                      | 2-P2    | If registered, provide the name of the registry (such as PROSPERO) and registration number                                                                                                                                    |
| Authors:                          |         |                                                                                                                                                                                                                               |
| Contact                           | 3a-P1   | Provide name, institutional affiliation, e-mail address of all protocol authors; provide physical mailing address of corresponding author                                                                                     |
| Contributions                     | 3b-P1   | Describe contributions of protocol authors and identify the guarantor of the review                                                                                                                                           |
| Amendments                        | NO      | If the protocol represents an amendment of a previously completed or published protocol, identify as such and list changes; otherwise, state plan for documenting important protocol amendments                               |
| Support:                          |         |                                                                                                                                                                                                                               |
| Sources                           | 5a-P8   | Indicate sources of financial or other support for the review                                                                                                                                                                 |
| Sponsor                           | 5b-P8   | Provide name for the review funder and/or sponsor                                                                                                                                                                             |
| Role of sponsor or funder         | 5c-P8   | Describe roles of funder(s), sponsor(s), and/or institution(s), if any, in developing the protocol                                                                                                                            |
| <b>INTRODUCTION</b>               |         |                                                                                                                                                                                                                               |
| Rationale                         | 6-P3    | Describe the rationale for the review in the context of what is already known                                                                                                                                                 |
| Objectives                        | 7-P3    | Provide an explicit statement of the question(s) the review will address with reference to participants, interventions, comparators, and outcomes (PICO)                                                                      |
| <b>METHODS</b>                    |         |                                                                                                                                                                                                                               |
| Eligibility criteria              | 8-P6    | Specify the study characteristics (such as PICO, study design, setting, time frame) and report characteristics (such as years considered, language, publication status) to be used as criteria for eligibility for the review |
| Information sources               | 9-P4    | Describe all intended information sources (such as electronic databases, contact with study authors, trial registers or other grey literature sources) with planned dates of coverage                                         |
| Search strategy                   | 10-P4   | Present draft of search strategy to be used for at least one electronic database, including planned limits, such that it could be repeated                                                                                    |
| Study records:                    |         |                                                                                                                                                                                                                               |
| Data management                   | 11a-P7  | Describe the mechanism(s) that will be used to manage records and data throughout the review                                                                                                                                  |

|    |                                    |        |                                                                                                                                                                                                                                                  |
|----|------------------------------------|--------|--------------------------------------------------------------------------------------------------------------------------------------------------------------------------------------------------------------------------------------------------|
| 1  |                                    |        |                                                                                                                                                                                                                                                  |
| 2  |                                    |        |                                                                                                                                                                                                                                                  |
| 3  | Selection process                  | 11b-P6 | State the process that will be used for selecting studies (such as two independent reviewers) through each phase of the review (that is, screening, eligibility and inclusion in meta-analysis)                                                  |
| 4  |                                    |        |                                                                                                                                                                                                                                                  |
| 5  | Data collection process            | 11c-P6 | Describe planned method of extracting data from reports (such as piloting forms, done independently, in duplicate), any processes for obtaining and confirming data from investigators                                                           |
| 6  |                                    |        |                                                                                                                                                                                                                                                  |
| 7  | Data items                         | 12-P6  | List and define all variables for which data will be sought (such as PICO items, funding sources), any pre-planned data assumptions and simplifications                                                                                          |
| 8  |                                    |        |                                                                                                                                                                                                                                                  |
| 9  | Outcomes and prioritization        | 13-P5  | List and define all outcomes for which data will be sought, including prioritization of main and additional outcomes, with rationale                                                                                                             |
| 10 |                                    |        |                                                                                                                                                                                                                                                  |
| 11 | Risk of bias in individual studies | 14-P7  | Describe anticipated methods for assessing risk of bias of individual studies, including whether this will be done at the outcome or study level, or both; state how this information will be used in data synthesis                             |
| 12 |                                    |        |                                                                                                                                                                                                                                                  |
| 13 | Data synthesis                     | 15a-P7 | Describe criteria under which study data will be quantitatively synthesised                                                                                                                                                                      |
| 14 |                                    | 15b-P7 | If data are appropriate for quantitative synthesis, describe planned summary measures, methods of handling data and methods of combining data from studies, including any planned exploration of consistency (such as $I^2$ , Kendall's $\tau$ ) |
| 15 |                                    | 15c-P7 | Describe any proposed additional analyses (such as sensitivity or subgroup analyses, meta-regression)                                                                                                                                            |
| 16 |                                    | 15d-P7 | If quantitative synthesis is not appropriate, describe the type of summary planned                                                                                                                                                               |
| 17 |                                    |        |                                                                                                                                                                                                                                                  |
| 18 | Meta-bias(es)                      | 16     | Specify any planned assessment of meta-bias(es) (such as publication bias across studies, selective reporting within studies)                                                                                                                    |
| 19 |                                    |        |                                                                                                                                                                                                                                                  |
| 20 | Confidence in cumulative evidence  | 17     | Describe how the strength of the body of evidence will be assessed (such as GRADE)                                                                                                                                                               |
| 21 |                                    |        |                                                                                                                                                                                                                                                  |

22 **\* It is strongly recommended that this checklist be read in conjunction with the PRISMA-P Explanation and Elaboration (cite when available) for important**  
 23 **clarification on the items. Amendments to a review protocol should be tracked and dated. The copyright for PRISMA-P (including checklist) is held by the**  
 24 **PRISMA-P Group and is distributed under a Creative Commons Attribution Licence 4.0.**

25  
 26 *From: Shamseer L, Moher D, Clarke M, Ghersi D, Liberati A, Petticrew M, Shekelle P, Stewart L, PRISMA-P Group. Preferred reporting items for systematic review and*  
 27 *meta-analysis protocols (PRISMA-P) 2015: elaboration and explanation. BMJ. 2015 Jan 2;349(jan02 1):g7647.*

# BMJ Open

## Risk factors for contrast-induced acute kidney injury (CI-AKI): Protocol for systematic review and meta-analysis

|                                 |                                                                                                                                                                                                                                                                                                                                                                                                                                                                                                                                                                                                                                                                                                                                                                                                                                                                                                                                                                                                                                                                                                                                                                                                                                                                                                                                                                                                    |
|---------------------------------|----------------------------------------------------------------------------------------------------------------------------------------------------------------------------------------------------------------------------------------------------------------------------------------------------------------------------------------------------------------------------------------------------------------------------------------------------------------------------------------------------------------------------------------------------------------------------------------------------------------------------------------------------------------------------------------------------------------------------------------------------------------------------------------------------------------------------------------------------------------------------------------------------------------------------------------------------------------------------------------------------------------------------------------------------------------------------------------------------------------------------------------------------------------------------------------------------------------------------------------------------------------------------------------------------------------------------------------------------------------------------------------------------|
| Journal:                        | <i>BMJ Open</i>                                                                                                                                                                                                                                                                                                                                                                                                                                                                                                                                                                                                                                                                                                                                                                                                                                                                                                                                                                                                                                                                                                                                                                                                                                                                                                                                                                                    |
| Manuscript ID                   | bmjopen-2019-030048.R2                                                                                                                                                                                                                                                                                                                                                                                                                                                                                                                                                                                                                                                                                                                                                                                                                                                                                                                                                                                                                                                                                                                                                                                                                                                                                                                                                                             |
| Article Type:                   | Protocol                                                                                                                                                                                                                                                                                                                                                                                                                                                                                                                                                                                                                                                                                                                                                                                                                                                                                                                                                                                                                                                                                                                                                                                                                                                                                                                                                                                           |
| Date Submitted by the Author:   | 04-Jul-2019                                                                                                                                                                                                                                                                                                                                                                                                                                                                                                                                                                                                                                                                                                                                                                                                                                                                                                                                                                                                                                                                                                                                                                                                                                                                                                                                                                                        |
| Complete List of Authors:       | Liu, Yong; Guangdong Provincial People's Hospital<br>Liang, Xingcheng; Guangdong Provincial People's Hospital; School of Pharmacy, Guangdong Pharmaceutical University, Guangzhou, 510000, Guangdong, China<br>Xin, Shaojun; Guangdong Provincial People's Hospital; School of Pharmacy, Guangdong Pharmaceutical University, Guangzhou, 510000, Guangdong, China<br>Liu, Jin; Guangdong Provincial People's Hospital<br>Sun, Guo-li; Guangdong Provincial People's Hospital<br>Chen, Shi-qun; Guangdong Provincial People's Hospital<br>cen, xiaolin; Guangdong Provincial People's Hospital; School of Pharmacy, Guangdong Pharmaceutical University, Guangzhou, 510000, Guangdong, China<br>dai, xiaohua; Guangdong Provincial People's Hospital; School of Pharmacy, Guangdong Pharmaceutical University, Guangzhou, 510000, Guangdong, China<br>He, Yibo; Guangdong Provincial People's Hospital<br>Song, Feier; Guangdong Provincial People's Hospital<br>Liang, Yan; Maoming People's Hospital, Cardiology<br>Hu, Yu-Ying; Department of Cardiology, First People's Hospital of Kashgar, Kashgar, Xinjiang844099, ChinaSciences, Guangzhou, Guangdong, China<br>Zhou, Yingling; Guangdong Provincial People's Hospital<br>chen, zhujun; Guangdong Provincial People's Hospital<br>Tan, Ning; Guangdong Provincial People's Hospital<br>Chen, Ji-yan; Guangdong Provincial People's Hospital |
| <b>Primary Subject Heading</b>: | Cardiovascular medicine                                                                                                                                                                                                                                                                                                                                                                                                                                                                                                                                                                                                                                                                                                                                                                                                                                                                                                                                                                                                                                                                                                                                                                                                                                                                                                                                                                            |
| Secondary Subject Heading:      | Cardiovascular medicine                                                                                                                                                                                                                                                                                                                                                                                                                                                                                                                                                                                                                                                                                                                                                                                                                                                                                                                                                                                                                                                                                                                                                                                                                                                                                                                                                                            |
| Keywords:                       | Coronary angiography, risk factor, contrast-induced nephropathy                                                                                                                                                                                                                                                                                                                                                                                                                                                                                                                                                                                                                                                                                                                                                                                                                                                                                                                                                                                                                                                                                                                                                                                                                                                                                                                                    |
|                                 |                                                                                                                                                                                                                                                                                                                                                                                                                                                                                                                                                                                                                                                                                                                                                                                                                                                                                                                                                                                                                                                                                                                                                                                                                                                                                                                                                                                                    |

SCHOLARONE™  
Manuscripts



1  
2  
3  
4  
5  
6  
7  
8  
9  
10  
11  
12  
13  
14  
15  
16  
17  
18  
19  
20  
21  
22  
23  
24  
25  
26  
27  
28  
29  
30  
31  
32  
33  
34  
35  
36  
37  
38  
39  
40  
41  
42  
43  
44  
45  
46  
47  
48  
49  
50  
51  
52  
53  
54  
55  
56  
57  
58  
59  
60

1  
2  
3  
4  
5 **Risk factors for contrast-induced acute kidney injury (CI-AKI):**  
6  
7  
8 **Protocol for systematic review and meta-analysis**  
9  
10

11  
12  
13 Yong Liu<sup>1§</sup>, Xingchen Liang<sup>1,2§</sup>, Shaojun Xin<sup>1,2§</sup>, Jin Liu<sup>1§</sup>, Guoli Sun<sup>1§</sup>, Shiqun Chen<sup>1§</sup>,  
14  
15 Xiaolin Cen<sup>1,2§</sup>, Xiaohua Dai<sup>1,2§</sup>, Yibo He<sup>1</sup>, Feier Song<sup>1</sup>, Yan, Liang<sup>3</sup>, Yuying Hu<sup>4</sup>,  
16  
17 Yingling Zhou<sup>1,5</sup>, Zhujun Chen<sup>1</sup>, Ning Tan<sup>1\*</sup>, Jiyan Chen<sup>1\*</sup>  
18  
19

20  
21 <sup>1</sup>Department of Cardiology, Guangdong provincial Key Laboratory of Coronary Heart Disease  
22  
23 Prevention, Guangdong Cardiovascular Institute, Guangdong General Hospital, Guangdong Academy of  
24  
25 Medical Sciences, Guangzhou, Guangdong, 510000, China  
26  
27

28  
29 <sup>2</sup>Guangdong Pharmaceutical University, Guangzhou, Guangdong, 510006, China  
30

31  
32 <sup>3</sup>Department of Cardiology, Maoming People's Hospital, Maoming, Guangdong, 525000 China  
33

34  
35 <sup>4</sup>Department of Cardiology, First People's Hospital of Kashgar, Kashgar, Xinjiang 844099, China  
36

37  
38 <sup>5</sup>Guangdong General Hospital Zhuhai Hospital (Zhuhai Golden Bay Center Hospital, Zhuhai),  
39  
40 Guangdong, 519040, China  
41

42  
43  
44 Corresponding Authors:  
45

46  
47 Jiyan Chen, PhD, MD<sup>a</sup>, FACC, FESC and Ning Tan PhD, MD<sup>a</sup>  
48

49  
50 Department of Cardiology, Guangdong Provincial Key Laboratory of Coronary Heart Disease  
51  
52 Prevention, Guangdong Cardiovascular Institute, Guangdong General Hospital, Guangdong Academy  
53  
54 of Medical Sciences, Guangzhou, Guangdong, 510000, China;  
55

56  
57 E-mail: chenjiyandr@126.com (JYC), and tanning100@126.com (NT)  
58  
59  
60

## Abstract

**Introduction:** Identifying the patients who are at risk for contrast-induced acute kidney injury (CI-AKI), which is defined as an increase in serum creatinine after exposure to contrast media, is a critical step in targeted prevention strategies. The absolute and relative importance of individual risk factors have not been systematically evaluated, let alone the new, controversial, and modifiable risk factors of CI-AKI.

**Methods and analysis:** On July 1<sup>st</sup>, 2019, a search was performed on MEDLINE, Embase, and the Cochrane Database of Systematic Reviews. We will perform a systematic review and meta-analysis to assess the important risk factors for developing CI-AKI, including those new, modifiable factors which are considered controversial. The secondary endpoint will be all-cause mortality. Two authors will then independently screen studies that meet the criteria for inclusion, consulting with a third author to resolve any dispute. The quality of the included studies will be assessed according to the Newcastle-Ottawa scale.

**Ethics and dissemination:** Ethics approval in this systematic review and meta-analysis protocol is not needed. We will disseminate the findings of this systematic review and meta-analysis via publications in peer-reviewed journals.

PROSPERO register number: CRD42019121534

**Abbreviations:** CI-AKI = contrast-induced acute kidney injury; GRADE = Grades of Recommendation, Assessment, Development and Evaluation; MACE = major adverse cardiovascular events; STEMI = ST-segment elevation myocardial infarction.

**Keywords:** Coronary angiography; risk factor; contrast-induced nephropathy.

### **Strengths and limitations of this study**

This will be the first, and largest, comprehensive systematic review of the diverse risk factors associated with CI-AKI.

Our broad search strategy will identify the important risk factors for CI-AKI for the purpose of preferentially supplying target prevention strategies, bringing attention to infrequently reported risk factors, and identifying new strategies to predict the risk of CI-AKI.

This study will also evaluate the new, modifiable risk factors, which are still considered controversial but may hold promise as preventive targets in the future.

This study will only select English-language articles from the peer-reviewed literature.

## Introduction

Contrast-induced acute kidney injury (CI-AKI) has been reported to be associated with poor clinical outcomes including increased short and long-term mortality, prolonged duration of hospital stay, the need for renal replacement therapy, and an increase in major adverse cardiac events.<sup>1 2</sup> The use of a risk prediction tool for CI-AKI could have several benefits. Primarily, it may help identify those patients at high risk for the disorder who might benefit from some prevention strategies like intravenous isotonic saline hydration which has been proven to be effective, statins and acetylcysteine that are controversial, or other interventions targeting the risk factors that will be identified in this meta-analysis in progress.<sup>3</sup> Critical predisposing factors for CI-AKI include older age, preexisting renal failure, hemodynamic instability, congestive heart failure, diabetes mellitus, anemia, and the volume of contrast media.<sup>4 5</sup> Although Allen et al.<sup>6</sup> and Silver et al.<sup>7</sup> systematically evaluated the current predictive models for CI-AKI, there has been no systematic assessment of the absolute and relative importance of the individual risk factors for CI-AKI, let alone, the new, modifiable, and controversial one, for example, the usage of ACEI/ARB or diuretics, smoking and body mass index.<sup>3</sup> This will be the first, and largest systematic review about the risk factors associated with CI-AKI. To address this deficit in knowledge, we will conduct a systematic review and a meta-analysis of the observational studies that have examined the absolute and relative importance of the risk factors of CI-AKI.

## Objectives

The objective of this study is to identify the relationship between the multiple risk factors of CI-AKI. More specifically, the goals of this study are the following:

1. To comprehensively and systematically assess the absolute and relative importance of the current common risk factors for CI-AKI
2. To systematically assess the new, controversial risk factors for CI-AKI

## Method

### *Patient and public involvement*

This is a protocol for a meta-analysis, and it will be not appropriate or possible to

1  
2  
3  
4 involve patients or the public in this work.

### 5 ***Search strategy***

6  
7 A systematic computer-aided search of related studies will be conducted in the  
8 following databases:  
9

- 10  
11 1. Ovid MEDLINE (1946 to June 30, 2019, including epub ahead of print, in process  
12 and other non-indexed citations and daily)
- 13  
14 2. Ovid Embase (1947 to June 2019)
- 15  
16 3. Cochrane Database of Systematic Reviews (published on or before 30th June 2019)

### 17 ***Initial keywords***

18  
19 The databases will be searched using the following initial keyword search terms:  
20  
21 coronary angiography; angiocardiograph; contrast medium; radiocontrast medium;  
22  
23 acute kidney injury; contrast-induced nephropathy; acute renal insufficiency; risk  
24  
25 factor; risk assessment; multivariate analysis; multivariable logistic regression; models.  
26  
27 We will restrict the search on the databases to English language publications. If we find  
28  
29 additional relevant keywords during any of the electronic searches, we will update the  
30  
31 electronic search strategies with these terms and document the changes (details in  
32  
33 Supplement).  
34  
35  
36  
37  
38

### 39 ***Types of studies***

40  
41 We will include all observational studies (registries, cohorts, etc.) that analyze the  
42  
43 correlation between risk factors and CI-AKI following procedures with contrast media.  
44  
45 This review will also consider experimental and epidemiological study designs,  
46  
47 including case-control and cohort studies, as being appropriate for inclusion in the  
48  
49 meta-analysis. However, we will exclude articles related to animal experiments.  
50  
51

### 52 ***Types of participants***

53  
54 We will include adults identified with the CI-AKI who are aged 18 years and above.  
55  
56  
57

### 58 ***Types of outcomes***

#### 59 ***Primary outcome***

60

1  
2  
3  
4 The primary endpoint will be CI-AKI, defined as an increase in serum creatinine after  
5 exposure to contrast media.  
6

### 7 ***Secondary outcome***

8  
9 The secondary endpoint will be long-term all-cause mortality, defined as death from  
10 any cause within the follow-up time of patient's post-index procedure.  
11  
12  
13

### 14 15 **Selection of studies**

16  
17 We will filter all retrieved articles. Two authors (XCL and SJX) will browse the titles  
18 and abstracts independently, and will record the excluded documents and the reasons  
19 for the exclusion. If there is a dispute in the process of the screening of the article, there  
20 will be a third author (YL) to arbitrate. After the initial screening, the two authors (GLS  
21 and JY) will then read the full text and further filter the articles according to the  
22 inclusion and exclusion criteria mentioned above. To avoid overlapping patient data in  
23 duplicate publications, registry analyses will be cross-checked with institutional studies  
24 and compared with other registry studies, and the larger or more complete publication  
25 will be included. In the process of reading the full text, if there is doubt in the selection,  
26 the two authors (XCL and SJX) will discuss it. If it cannot be resolved, there will be a  
27 third author (LY) to arbitrate. Finally, all selected articles will be listed for further  
28 analysis, and the excluded articles will be classified according to the reasons for  
29 exclusion.  
30  
31  
32  
33  
34  
35  
36  
37  
38  
39  
40  
41  
42  
43  
44

### 45 **Quality assessment/assessment of the risk of bias in included studies**

46 Two authors will independently assess the quality of selected articles using the  
47 *Newcastle-Ottawa Scale*.<sup>8</sup>  
48

#### 49 ***Observational studies using Newcastle-Ottawa Scale:***

#### 50 **CASE-CONTROL STUDIES**

##### 51 **Selection**

- 52 1) Is the Case Definition Adequate?
- 53 2) Representativeness of the Cases
- 54 3) Selection of Controls
- 55 4) Definition of Controls

##### 56 **Comparability**

57  
58  
59  
60

1  
2  
3 1) Comparability of Cases and Controls on the Basis of the Design or Analysis

4 Exposure

5 1) Ascertainment of Exposure

6 2) Non-Response Rate

7 COHORT STUDIES

8 Selection

9 1) Representativeness of the Exposed Cohort

10 2) Selection of the Non-Exposed Cohort

11 3) Ascertainment of Exposure

12 4) Demonstration That Outcome of Interest Was Not Present at Start of Study

13 Comparability

14 1) Comparability of Cohorts on the Basis of the Design or Analysis

15 Outcome

16 1) Assessment of Outcome

17 2) Was Follow-Up Long Enough for Outcomes to Occur

18 3) Adequacy of Follow-Up of Cohorts

19 We will rate each selected article with a rating of low, high, or unclear, and the results  
20 will be presented in the form of a table. In addition, we will use the Risk of Bias in  
21 Nonrandomized studies of Interventions tool (ROBINS-I)<sup>9</sup> to enhance the  
22 reproducibility and comparability of this review to future reviews of a similar topic.  
23  
24  
25  
26  
27  
28  
29  
30  
31  
32

33 **Data synthesis:**

34 We will use STATA Ver13.0 software and RevMan for data analysis, and risk factor  
35 effect sizes will be expressed as an odds ratio and their 95% CI. Using standard chi-  
36 square test to assess the heterogeneity and variable statistics, we will perform subgroup  
37 analysis to conduct data statistics. If there are data that cannot be counted in the selected  
38 article, the data will be listed in the form of a table or chart. EndNote will be used for  
39 managing references.  
40  
41  
42  
43  
44  
45  
46

47 Sensitivity analysis. We will perform sensitivity analyses in order to explore the  
48 influence of the following factors on effect sizes:  
49

50 1. Restricting the analysis to studies of coronary angiography.

51 2. Restricting the analysis to large cohort studies with more than 1000 subjects.  
52  
53  
54  
55  
56

57 **Meta-biases**

58 We will evaluate the possibility of publication bias using funnel plots and take Egger's  
59  
60



1  
2  
3  
4 test of bias as a complement. Unpublished data will also be considered in the evaluation  
5 of the publication bias, and we will try to contact the author for assistance in this regard.  
6  
7  
8

### 9 **Confidence in cumulative evidence**

10 We will evaluate the strength of evidence for all outcomes by performing the Grading  
11 of Recommendations Assessment, Development and Evaluation working group  
12 methodology. The quality of evidence will be assessed across the domains of risk of  
13 bias, precision, directness, consistency, and publication bias. Strength will be judged as  
14 high (further research is improbable to alter our confidence in the estimate of effect),  
15 moderate (further research will probably generate an important impact on our  
16 confidence in the estimate of effect and may alter the estimate), low (further research  
17 is very likely to generate an important impact on our confidence in the estimate of effect  
18 and change the estimate), or very low (the estimate of effect is indeterminable).<sup>10</sup>  
19  
20  
21  
22  
23  
24  
25  
26  
27  
28  
29  
30

### 31 **Conclusion:**

32 The goal of this systematic review and meta-analysis is to clearly identify the important  
33 risk factors for CI-AKI for the purpose of preferentially supplying target prevention  
34 strategies, including contrast limiting and hydration for those high risk factors. In  
35 addition, the modifiable, new, and controversial factors will also be evaluated, as they  
36 may have potential as preventive targets.  
37  
38  
39  
40  
41  
42  
43  
44  
45  
46  
47  
48  
49  
50

### 51 **Author affiliations**

#### 52 *Contributions*

53 Yong Liu, Xingchen Liang, Shaojun Xin, Jin Liu, Guoli Sun, Shiqun Chen, Xiaolin  
54 Cen, Xiaohua Dai, Yibo He, Feier Song, Yan Liang, Yuying Hu, Yingling Zhou,  
55 Zhujun Chen, Ning Tan, Jiyan Chen: conception and design of the work; Yong Liu,  
56 Xingchen Liang, Shaojun Xin, Xiaolin Cen, Xiaohua Dai: determining search terms,  
57 related literature search; Yong Liu, Xingchen Liang, Shaojun Xin, Jin Liu, Guoli Sun,  
58  
59  
60

1  
2  
3  
4 Shiqun Chen, Xiaolin Cen, Xiaohua Dai, Yibo He, Feier Song: filter literature  
5 according to established standards; Yan Liang, Yuying Hu, Yingling Zhou, Zhujun  
6 Chen, Ning Tan, Jiyan Chen: as a third author, judge the doubtful literature; Yong Liu,  
7 Shiqun Chen: acquisition, analysis, or interpretation of data; Yong Liu, Shiqun Chen,  
8 Jiyan Chen, Yong Liu, Ning Tan: drafting the work or revising it critically for important  
9 intellectual content. All authors agree that this is the final version of the article. All  
10 authors agree to be accountable for all aspects of the work in ensuring that questions  
11 related to the accuracy or integrity of any part of the work are appropriately investigated  
12 and resolved.  
13  
14  
15  
16  
17  
18  
19  
20

### 21 ***Competing interests***

22  
23 None declared  
24

### 25 ***Funding***

26  
27 The study is supported by the Science and Technology Planning Project of Guangdong  
28 Province (grant no. 2014B070706010), The Technology Planning Project of Dongguan  
29 Province (grant no. 2015108101022), The National Science Foundation for Young  
30 Scientists of China (grant no. 81500520), and The Progress in Science and Technology  
31 Project of Guangdong Province (grant no. 2015A030302037) .  
32  
33  
34  
35

### 36 ***Data sharing statement***

37  
38 All authors will share all data.  
39  
40  
41  
42  
43  
44  
45  
46  
47  
48  
49  
50  
51  
52  
53  
54  
55  
56  
57  
58  
59  
60

## References

1. Tsai TT, Patel UD, Chang TI, et al. Contemporary incidence, predictors, and outcomes of acute kidney injury in patients undergoing percutaneous coronary interventions: insights from the NCDR Cath-PCI registry. *JACC Cardiovasc Interv* 2014;7(1):1-9. doi: 10.1016/j.jcin.2013.06.016
2. James MT, Samuel SM, Manning MA, et al. Contrast-induced acute kidney injury and risk of adverse clinical outcomes after coronary angiography: a systematic review and meta-analysis. *Circ Cardiovasc Interv* 2013;6(1):37-43. doi: 10.1161/CIRCINTERVENTIONS.112.974493
3. Mehran R, Dangas GD, Weisbord SD. Contrast-Associated Acute Kidney Injury. *N Engl J Med* 2019;380(22):2146-55. doi: 10.1056/NEJMra1805256
4. Gurm HS, Seth M, Kooiman J, et al. A novel tool for reliable and accurate prediction of renal complications in patients undergoing percutaneous coronary intervention. *J Am Coll Cardiol* 2013;61(22):2242-8. doi: 10.1016/j.jacc.2013.03.026
5. Mehran R, Aymong ED, Nikolsky E, et al. A simple risk score for prediction of contrast-induced nephropathy after percutaneous coronary intervention: development and initial validation. *J Am Coll Cardiol* 2004;44(7):1393-9. doi: 10.1016/j.jacc.2004.06.068
6. Allen DW, Ma B, Leung KC, et al. Risk Prediction Models for Contrast-Induced Acute Kidney Injury Accompanying Cardiac Catheterization: Systematic Review and Meta-analysis. *Can J Cardiol* 2017;33(6):724-36. doi: 10.1016/j.cjca.2017.01.018
7. Silver SA, Shah PM, Chertow GM, et al. Risk prediction models for contrast induced nephropathy: systematic review. *BMJ* 2015;351:h4395. doi: 10.1136/bmj.h4395
8. Wells GA, Shea B, O'Connell D, Peterson J, Welch V, Losos M, Tugwell P. The Newcastle-Ottawa Scale (NOS) for assessing the quality of nonrandomised studies in meta-analyses [webpage on the Internet] Ottawa, ON: Ottawa Hospital Research Institute; 2011. [Accessed February 5, 2013]. Available from: [http://www.ohri.ca/programs/clinical\\_epidemiology/oxford.asp](http://www.ohri.ca/programs/clinical_epidemiology/oxford.asp).

1  
2  
3  
4 9. Sterne JA, Hernan MA, Reeves BC, et al. ROBINS-I: a tool for assessing risk of  
5 bias in non-randomised studies of interventions. Bmj 2016;355:i4919. doi:

6  
7 10.1136/bmj.i4919 [published Online First: 2016/10/14]

8  
9 10. Shamseer L, Moher D, Clarke M, et al. Preferred reporting items for systematic  
10 review and meta-analysis protocols (PRISMA-P) 2015: elaboration and explanation.  
11 Bmj 2015;350:g7647. doi: 10.1136/bmj.g7647 [published Online First: 2015/01/04]  
12  
13  
14  
15  
16  
17  
18  
19  
20  
21  
22  
23  
24  
25  
26  
27  
28  
29  
30  
31  
32  
33  
34  
35  
36  
37  
38  
39  
40  
41  
42  
43  
44  
45  
46  
47  
48  
49  
50  
51  
52  
53  
54  
55  
56  
57  
58  
59  
60

## Draft MEDLINE and EMBASE search - Ovid interface

- 1
  - 2
  - 3
  - 4
  - 5
  - 6
  - 7
  - 8
  - 9
  - 10
  - 11
  - 12
  - 13
  - 14
  - 15
  - 16
  - 17
  - 18
  - 19
  - 20
  - 21
  - 22
  - 23
  - 24
  - 25
  - 26
  - 27
  - 28
  - 29
  - 30
  - 31
  - 32
  - 33
  - 34
  - 35
  - 36
  - 37
  - 38
  - 39
  - 40
  - 41
  - 42
  - 43
  - 44
  - 45
  - 46
  - 47
  - 48
  - 49
  - 50
  - 51
  - 52
  - 53
  - 54
  - 55
  - 56
  - 57
  - 58
  - 59
  - 60
- 1. exp Contrast Media/
  - 2. (contrast media or contrast medium or contrast material\$ or contrast agent\$ or contrast dye or radiographic contrast).ti,ab.
  - 3. (radiocontrast media or radiocontrast medium or radiocontrast agent\$).ti,ab.
  - 4. 1 or 2 or 3
  - 5. (nephritis or nephropath\$ or nephrotoxic\$).ti,ab.
  - 6. ((impair\$ or damag\$ or reduc\$ or injur\$ dysfunction\$ or failure) adj2 (renal or kidney)).ti,ab.
  - 7. exp Kidney Diseases/
  - 8. exp nephritis/ or diabetic nephropathies/
  - 9. exp renal insufficiency/
  - 10. acute kidney injury.ti,ab.
  - 11. acute kidney injur\*.ti,ab.
  - 12. acute kidney failure\*.ti,ab.
  - 13. Acute kidney insufficienc\*.ti,ab.
  - 14. contrast induced nephropathy
  - 15. contrast induced nephropath\*.ti,ab.
  - 16. contrast nephropath\*.ti,ab.
  - 17. contrast induced acute kidney injur\*.ti,ab.
  - 18. AKI.ti,ab.
  - 19. ARF.ti,ab.
  - 20. CIN.ti,ab.
  - 21. acute renal injur\*.ti,ab.
  - 22. acute renal failure\*.ti,ab.
  - 23. acute renal insufficienc\*.ti,ab.
  - 24. 5 or 6 or 7 or 8 or 9 or 10 or 11 or 12 or 13 or 14 or 15 or 16 or 17 or 18 or 19 or 20 or 21 or 22 or 23
  - 25. Risk Assessment/
  - 26. risk factors/

- 1
- 2
- 3
- 4 -27. (risk adj3 model\*).ti,ab.
- 5
- 6 -28. score\*.ti,ab.
- 7
- 8 -29. Forecasting/
- 9
- 10 -30. prognostic factor\*.ti,ab.
- 11
- 12 -31. "Predictive Value of Tests"/
- 13
- 14 -32. predict\*.ti,ab.
- 15
- 16 -33. regression\*.ti,ab.
- 17
- 18 -34. (logistic adj2 model\*).ti,ab.
- 19
- 20 -35. multivariate analysis/
- 21
- 22 -36. multivariable logistic regression
- 23
- 24 -37. (multivariate adj3 analysis).ti,ab.
- 25
- 26 -38. sn.fs.
- 27
- 28 -39. exp mathematical concepts/
- 29
- 30 -40. exp Models, Biological/
- 31
- 32 -41. exp models, statistical/
- 33
- 34 -42. area under curve/
- 35
- 36 -43. algorithm\*.ti,ab.
- 37
- 38 -44. equation\*.ti,ab.
- 39
- 40 -45. 25 or 26 or 27 or 28 or 29 or 30 or 31 or 32 or 33 or 34 or 35 or 36 or 37 or 38 or
- 41 39 or 40 or 41 or 42 or 43 or 44
- 42
- 43 -46. 4 and 24 and 45
- 44
- 45 -47. remove duplicates from 46
- 46
- 47
- 48
- 49 Draft Cochrane database search
- 50
- 51 -1. (contrast media or contrast medium or contrast material\$ or contrast agent\$ or
- 52 contrast dye or radiographic contrast).ti,ab.
- 53
- 54 -2. (radiocontrast media or radiocontrast medium or radiocontrast agent\$).ti,ab.
- 55
- 56 -3. (percutaneous coronary intervention or PCI or coronary angiograph or
- 57 angiography or catheter-proven or Angioplasty).ti,ab.
- 58
- 59 -4. 1 or 2 or 3
- 60

1  
2  
3  
4 -5. (nephritis or nephropath\$ or nephrotoxic\$).ti,ab.

5  
6 -6. ((impair\$ or damag\$ or reduc\$ or injur\$ dysfunction\$ or failure) adj2 (renal or  
7 kidney)).ti,ab.

8  
9 -7. (Kidney Diseases or nephritis or diabetic nephropathies or renal insufficiency or  
10 acute kidney injury or acute kidney injur\* or acute kidney failure\* or Acute kidney  
11 insufficienc\* or contrast induced nephropathy or contrast induced nephropath\* or  
12 contrast nephropath\* or contrast induced acute kidney injur\* or AKI or ARF or CIN  
13 or acute renal injur\* or acute renal failure\* or acute renal insufficienc\* or creatinine  
14 or serum creatinine).ti,ab.

15  
16  
17  
18  
19  
20  
21 -8. 5 or 6 or 7

22  
23 -9. ((risk adj3 model\*) or score\* or prognostic factor\* or predict\* or regression\* or  
24 (logistic adj2 model\*) or multivariable logistic regression or multivariable analyses or  
25 logistic regression or algorithm\* or equation\* or (multivariate adj3 analysis or  
26 Forecasting or "Predictive Value of Tests" or multivariate analysis or mathematical  
27 concepts or Models, Biological or models, statistical or area under curve)).ti,ab.

28  
29  
30  
31  
32  
33 -10. 4 and 8 and 9  
34  
35  
36  
37  
38  
39  
40  
41  
42  
43  
44  
45  
46  
47  
48  
49  
50  
51  
52  
53  
54  
55  
56  
57  
58  
59  
60

**PRISMA-P (Preferred Reporting Items for Systematic review and Meta-Analysis Protocols) 2015 checklist: recommended items to address in a systematic review protocol\***

| Section and topic                 | Item No | Checklist item                                                                                                                                                                                                                |
|-----------------------------------|---------|-------------------------------------------------------------------------------------------------------------------------------------------------------------------------------------------------------------------------------|
| <b>ADMINISTRATIVE INFORMATION</b> |         |                                                                                                                                                                                                                               |
| Title:                            |         |                                                                                                                                                                                                                               |
| Identification                    | 1a-P1   | Identify the report as a protocol of a systematic review                                                                                                                                                                      |
| Update                            | NO      | If the protocol is for an update of a previous systematic review, identify as such                                                                                                                                            |
| Registration                      | 2-P2    | If registered, provide the name of the registry (such as PROSPERO) and registration number                                                                                                                                    |
| Authors:                          |         |                                                                                                                                                                                                                               |
| Contact                           | 3a-P1   | Provide name, institutional affiliation, e-mail address of all protocol authors; provide physical mailing address of corresponding author                                                                                     |
| Contributions                     | 3b-P1   | Describe contributions of protocol authors and identify the guarantor of the review                                                                                                                                           |
| Amendments                        | NO      | If the protocol represents an amendment of a previously completed or published protocol, identify as such and list changes; otherwise, state plan for documenting important protocol amendments                               |
| Support:                          |         |                                                                                                                                                                                                                               |
| Sources                           | 5a-P8   | Indicate sources of financial or other support for the review                                                                                                                                                                 |
| Sponsor                           | 5b-P8   | Provide name for the review funder and/or sponsor                                                                                                                                                                             |
| Role of sponsor or funder         | 5c-P8   | Describe roles of funder(s), sponsor(s), and/or institution(s), if any, in developing the protocol                                                                                                                            |
| <b>INTRODUCTION</b>               |         |                                                                                                                                                                                                                               |
| Rationale                         | 6-P3    | Describe the rationale for the review in the context of what is already known                                                                                                                                                 |
| Objectives                        | 7-P3    | Provide an explicit statement of the question(s) the review will address with reference to participants, interventions, comparators, and outcomes (PICO)                                                                      |
| <b>METHODS</b>                    |         |                                                                                                                                                                                                                               |
| Eligibility criteria              | 8-P6    | Specify the study characteristics (such as PICO, study design, setting, time frame) and report characteristics (such as years considered, language, publication status) to be used as criteria for eligibility for the review |
| Information sources               | 9-P4    | Describe all intended information sources (such as electronic databases, contact with study authors, trial registers or other grey literature sources) with planned dates of coverage                                         |
| Search strategy                   | 10-P4   | Present draft of search strategy to be used for at least one electronic database, including planned limits, such that it could be repeated                                                                                    |
| Study records:                    |         |                                                                                                                                                                                                                               |
| Data management                   | 11a-P7  | Describe the mechanism(s) that will be used to manage records and data throughout the review                                                                                                                                  |



|                                    |        |                                                                                                                                                                                                                                                  |
|------------------------------------|--------|--------------------------------------------------------------------------------------------------------------------------------------------------------------------------------------------------------------------------------------------------|
| Selection process                  | 11b-P6 | State the process that will be used for selecting studies (such as two independent reviewers) through each phase of the review (that is, screening, eligibility and inclusion in meta-analysis)                                                  |
| Data collection process            | 11c-P6 | Describe planned method of extracting data from reports (such as piloting forms, done independently, in duplicate), any processes for obtaining and confirming data from investigators                                                           |
| Data items                         | 12-P6  | List and define all variables for which data will be sought (such as PICO items, funding sources), any pre-planned data assumptions and simplifications                                                                                          |
| Outcomes and prioritization        | 13-P5  | List and define all outcomes for which data will be sought, including prioritization of main and additional outcomes, with rationale                                                                                                             |
| Risk of bias in individual studies | 14-P7  | Describe anticipated methods for assessing risk of bias of individual studies, including whether this will be done at the outcome or study level, or both; state how this information will be used in data synthesis                             |
| Data synthesis                     | 15a-P7 | Describe criteria under which study data will be quantitatively synthesised                                                                                                                                                                      |
|                                    | 15b-P7 | If data are appropriate for quantitative synthesis, describe planned summary measures, methods of handling data and methods of combining data from studies, including any planned exploration of consistency (such as $I^2$ , Kendall's $\tau$ ) |
|                                    | 15c-P7 | Describe any proposed additional analyses (such as sensitivity or subgroup analyses, meta-regression)                                                                                                                                            |
|                                    | 15d-P7 | If quantitative synthesis is not appropriate, describe the type of summary planned                                                                                                                                                               |
| Meta-bias(es)                      | 16     | Specify any planned assessment of meta-bias(es) (such as publication bias across studies, selective reporting within studies)                                                                                                                    |
| Confidence in cumulative evidence  | 17     | Describe how the strength of the body of evidence will be assessed (such as GRADE)                                                                                                                                                               |

**\* It is strongly recommended that this checklist be read in conjunction with the PRISMA-P Explanation and Elaboration (cite when available) for important clarification on the items. Amendments to a review protocol should be tracked and dated. The copyright for PRISMA-P (including checklist) is held by the PRISMA-P Group and is distributed under a Creative Commons Attribution Licence 4.0.**

*From: Shamseer L, Moher D, Clarke M, Ghersi D, Liberati A, Petticrew M, Shekelle P, Stewart L, PRISMA-P Group. Preferred reporting items for systematic review and meta-analysis protocols (PRISMA-P) 2015: elaboration and explanation. BMJ. 2015 Jan 2;349(jan02 1):g7647.*
