# Supplementary material for: Risk factors for contrast-induced acute kidney injury (CI-AKI): protocol for systematic review and meta-analysis
Source: PubMed Central journal article supplement — BMJ Open. 2019 Aug 15;9(8):e030048. doi: 10.1136/bmjopen-2019-030048 (PMC6701697; doi:10.1136/bmjopen-2019-030048), 2019-08-15
Supplement: bmjopen-2019-030048supp001.pdf [file bmjopen-2019-030048supp001.pdf]

Draft MEDLINE and EMBASE search - Ovid interface

- 1. exp Contrast Media/
- 2. (contrast media or contrast medium or contrast material\$ or contrast agent\$ or contrast dye or radiographic contrast).ti,ab.
- 3. (radiocontrast media or radiocontrast medium or radiocontrast agent\$).ti,ab.
- 4. 1 or 2 or 3
- 5. (nephritis or nephropath\$ or nephrotoxic\$).ti,ab.
- 6. ((impair\$ or damag\$ or reduc\$ or injur\$ dysfunction\$ or failure) adj2 (renal or kidney)).ti,ab.
- 7. exp Kidney Diseases/
- 8. exp nephritis/ or diabetic nephropathies/
- 9. exp renal insufficiency/
- 10. acute kidney injury.ti,ab.
- 11. acute kidney injur\*.ti,ab.
- 12. acute kidney failure\*.ti,ab.
- 13. Acute kidney insufficienc\*.ti,ab.
- 14. contrast induced nephropathy
- 15. contrast induced nephropath\*.ti,ab.
- 16. contrast nephropath\*.ti,ab.
- 17. contrast induced acute kidney injur\*.ti,ab.
- 18. AKI.ti,ab.
- 19. ARF.ti,ab.
- 20. CIN.ti,ab.
- 21. acute renal injur\*.ti,ab.
- 22. acute renal failure\*.ti,ab.
- 23. acute renal insufficienc\*.ti,ab.
- 24. 5 or 6 or 7 or 8 or 9 or 10 or 11 or 12 or 13 or 14 or 15 or 16 or 17 or 18 or 19 or 20 or 21 or 22 or 23
- 25. Risk Assessment/
- 26. risk factors/

- 27. (risk adj3 model\*).ti,ab.
- 28. score\*.ti,ab.
- 29. Forecasting/
- 30. prognostic factor\*.ti,ab.
- 31. "Predictive Value of Tests"/
- 32. predict\*.ti,ab.
- 33. regression\*.ti,ab.
- 34. (logistic adj2 model\*).ti,ab.
- 35. multivariate analysis/
- 36. multivariable logistic regression
- 37. (multivariate adj3 analysis).ti,ab.
- 38. sn.fs.
- 39. exp mathematical concepts/
- 40. exp Models, Biological/
- 41. exp models, statistical/
- 42. area under curve/
- 43. algorithm\*.ti,ab.
- 44. equation\*.ti,ab.
- 45. 25 or 26 or 27 or 28 or 29 or 30 or 31 or 32 or 33 or 34 or 35 or 36 or 37 or 38 or 39 or 40 or 41 or 42 or 43 or 44
- 46. 4 and 24 and 45
- 47. remove duplicates from 46

#### Draft Cochrane database search

- 1. (contrast media or contrast medium or contrast material\$ or contrast agent\$ or contrast dye or radiographic contrast).ti,ab.
- 2. (radiocontrast media or radiocontrast medium or radiocontrast agent\$).ti,ab.
- 3. (percutaneous coronary intervention or PCI or coronary angiograph or angiography or catheter-proven or Angioplasty).ti,ab.
- 4. 1 or 2 or 3

- 5. (nephritis or nephropath\$ or nephrotoxic\$).ti,ab.
- 6. ((impair\$ or damag\$ or reduc\$ or injur\$ dysfunction\$ or failure) adj2 (renal or kidney)).ti,ab.
- 7. (Kidney Diseases or nephritis or diabetic nephropathies or renal insufficiency or acute kidney injury or acute kidney injur\* or acute kidney failure\* or Acute kidney insufficienc\* or contrast induced nephropathy or contrast induced nephropath\* or contrast nephropath\* or contrast induced acute kidney injur\* or AKI or ARF or CIN or acute renal injur\* or acute renal failure\* or acute renal insufficienc\* or creatinine or serum creatinine).ti,ab.
- 8. 5 or 6 or 7
- 9. ((risk adj3 model\*) or score\* or prognostic factor\* or predict\* or regression\* or (logistic adj2 model\*) or multivariable logistic regression or multivariable analyses or logistic regression or algorithm\* or equation\* or (multivariate adj3 analysis or Forecasting or "Predictive Value of Tests" or multivariate analysis or mathematical concepts or Models, Biological or models, statistical or area under curve)).ti,ab.
- 10. 4 and 8 and 9
